# Supplementary material for: Basal Contamination of Sequencing: Lessons from the GTEx dataset
Source: bioRxiv or medRxiv preprint supplement (doi:10.1101/602367), 2020-01-02
Supplement: Supplementary file [file media-1.pdf]

## **Description of Additional Supplementary Files**

### **File Name: Supplementary Data 1**

**Description:** Ratio of tissues sequenced on pancreas and non-pancreas days.

### **File Name: Supplementary Data 2**

**Description:** Ratio of tissues sequenced on esophagus and non-esophagus days.

### **File Name: Supplementary Data 3**

**Description:** The output of the pancreas gene contamination linear mixed model.

### **File Name: Supplementary Data 4**

**Description:** The output of the esophagus mucosa gene contamination linear mixed model.

### **File Name: Supplementary Data 5**

**Description:** A technical comparison of the GTEX1 fibroblast sample and its main contaminating GTEX2 esophagus sample.

### **File Name: Supplementary Data 6**

**Description:** Ten RNA-seq experiments with two or more tissues/cells all demonstrating cross contamination between samples.
